# Supplementary material
Source: MDPI journal article supplement (https://www.mdpi.com/2073-4344/13/3/551)
Supplement: s1 [file s1]

# Surfactant-Assisted Liquid-Phase Exfoliated Nano-Sized Bi<sub>2</sub>S<sub>3</sub> for Electrocatalytic Hydrogen Evolution

Mengjiao Wang <sup>1,\*</sup>, Matteo Crisci <sup>1</sup>, Matilde Pavan <sup>1</sup>, Zheming Liu <sup>2</sup>, Jaime Gallego <sup>1</sup> and Teresa Gatti <sup>1,3,\*</sup>

<sup>1</sup> Institute of Physical Chemistry and Center for Materials Research (LaMa), Justus Liebig University, 35392 Giessen, Germany

<sup>2</sup> Nanochemistry Department, Istituto Italiano di Tecnologia, 16163 Genova, Italy

<sup>3</sup> Department of Applied Science and Technology, Politecnico di Torino, 10129 Torino, Italy

## Table of Contents

- XPS data for LPE Bi<sub>2</sub>S<sub>3</sub>/SC (Figure S1)
- Various exfoliation data for LPE Bi<sub>2</sub>S<sub>3</sub>/SDS and LPE Bi<sub>2</sub>S<sub>3</sub>/SC (Table S1, S2, S3, S4, S5, S6, S8 and Figure S2, S3, S4, S5, S6, S7)
- Electrochemical data for LPE Bi<sub>2</sub>S<sub>3</sub>/SC (Figure S8, S9, S10 and Table S7)

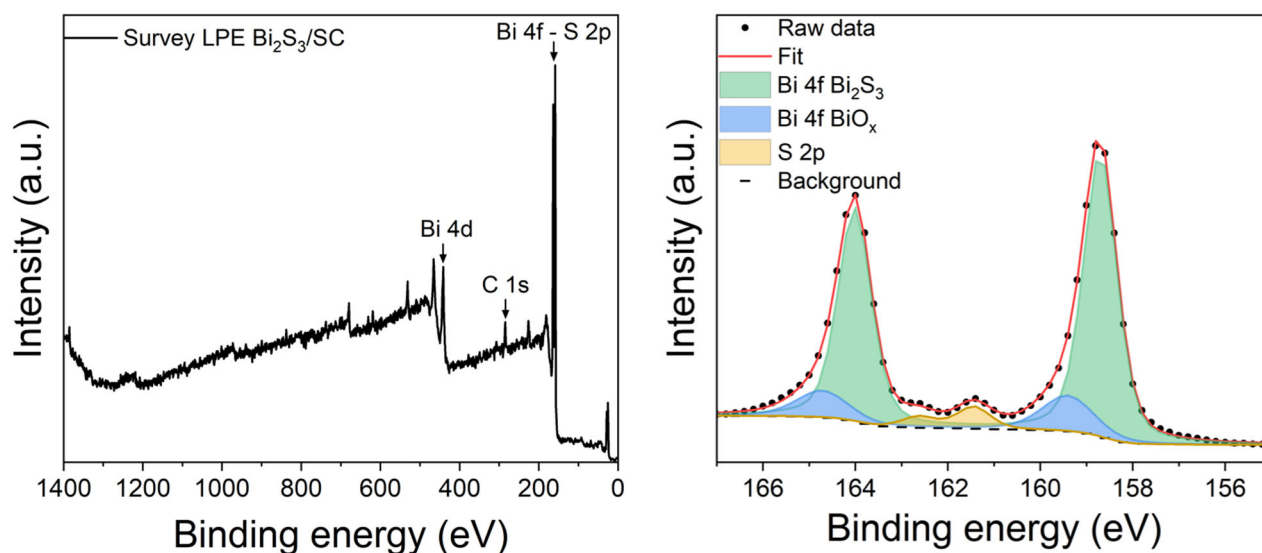

**Figure S1.** XPS spectrum of LPE Bi<sub>2</sub>S<sub>3</sub>/SC. a) XPS survey data, and b) high-resolution XPS spectra of Bi 4f and S 2p.

**Table S1.** Zeta potential ( $\zeta$ ), average size (from DLS), band gap (from UV-Vis-NIR), concentration and yield with different concentrations of surfactant of LPE Bi<sub>2</sub>S<sub>3</sub>/SDS. All the exfoliations were performed with a shear mixer (SM) for 3 h. The concentration of Bi<sub>2</sub>S<sub>3</sub> in all the experiments is fixed to 0.33 mg/mL.

| SDS (mg/mL) | $\zeta$ (eV) | Size (nm) | Eg (eV) | Exfoliated Bi <sub>2</sub> S <sub>3</sub> (mg/ml) | Yield % |
|-------------|--------------|-----------|---------|---------------------------------------------------|---------|
| 1.0         | -46          | 190       | 1.6     | 0.010                                             | 3.1     |
| 2.0         | -56          | 185       | 1.6     | 0.011                                             | 3.4     |
| 4.0         | -60          | 220       | 1.5     | 0.014                                             | 4.5     |
| 8.0         | -56          | 183       | 1.8     | 0.012                                             | 3.6     |

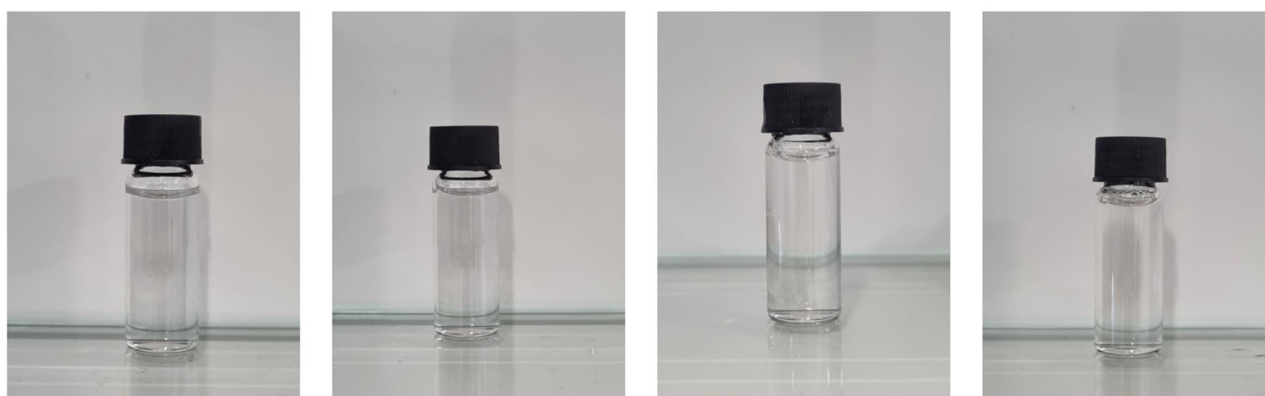

**Figure S2.** Pictures of Bi<sub>2</sub>S<sub>3</sub> suspensions prepared with SDS (1.0, 2.0, 4.0 and 8.0 mg/mL from left to right) in water.

**Table S2.** Zeta potential ( $\zeta$ ), average size (from DLS), band gap (from UV-Vis-NIR), concentration and yield with different concentrations of surfactant of LPE Bi<sub>2</sub>S<sub>3</sub>/SC. All the exfoliations were performed with a shear mixer (SM) for 3 h. The concentration of Bi<sub>2</sub>S<sub>3</sub> in all the experiments is fixed to 0.33 mg/mL.

| SC (mg/mL) | $\zeta$ (eV) | Size (nm) | Eg (eV) | Exfoliated Bi <sub>2</sub> S <sub>3</sub> (mg/ml) | Yield % |
|------------|--------------|-----------|---------|---------------------------------------------------|---------|
| 1.0        | -27          | 140       | 1.7     | 0.021                                             | 6.3     |
| 2.0        | -30          | 220       | 1.9     | 0.033                                             | 10.0    |
| 4.0        | -48          | 215       | 1.9     | 0.041                                             | 12.3    |
| 8.0        | -37          | 250       | 2.0     | 0.040                                             | 12.0    |

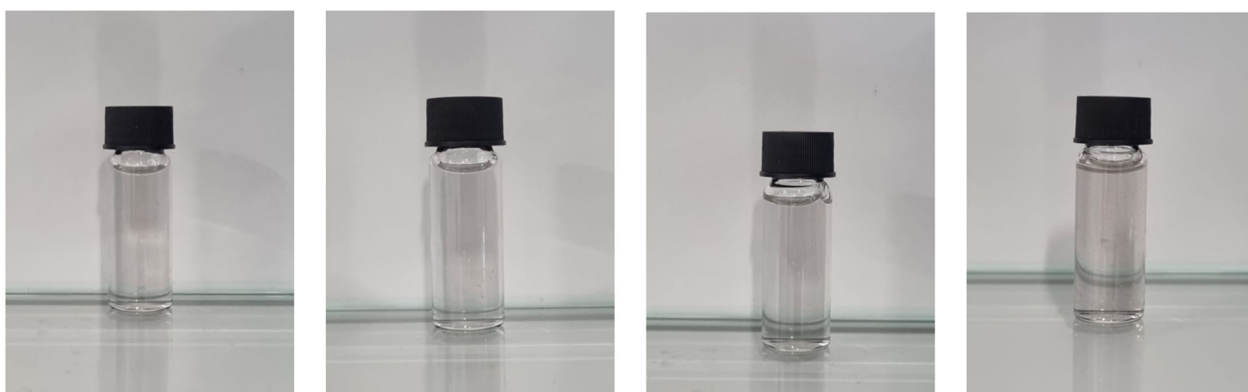

**Figure S3.** Pictures of Bi<sub>2</sub>S<sub>3</sub> suspensions prepared with SC (1.0, 2.0, 4.0 and 8.0 mg/mL from left to right) in water. All the exfoliations were performed with a SM for 3 h and using 0.33 mg/mL of Bi<sub>2</sub>S<sub>3</sub>.

**Table S3.** Zeta potential ( $\zeta$ ), average size (from DLS), band gap (from UV-Vis-NIR), concentration and yield with different concentrations of bulk Bi<sub>2</sub>S<sub>3</sub> of LPE Bi<sub>2</sub>S<sub>3</sub>/SC. All the exfoliations were performed with a shear mixer (SM) for 3 h. The concentration of SC in all the experiments is fixed to 4.0 mg/mL.

| Bi <sub>2</sub> S <sub>3</sub> (mg/mL) | $\zeta$ (eV) | Size (nm) | Eg (eV) | Exfoliated Bi <sub>2</sub> S <sub>3</sub> (mg/mL) | Yield % |
|----------------------------------------|--------------|-----------|---------|---------------------------------------------------|---------|
| 0.33                                   | -48          | 215       | 1.9     | 0.04                                              | 12.3    |
| 0.67                                   | -47          | 190       | 1.9     | 0.08                                              | 11.7    |
| 1.33                                   | -40          | 165       | 1.9     | 0.17                                              | 12.5    |
| 2.67                                   | -41          | 165       | 2.0     | 0.18                                              | 6.7     |

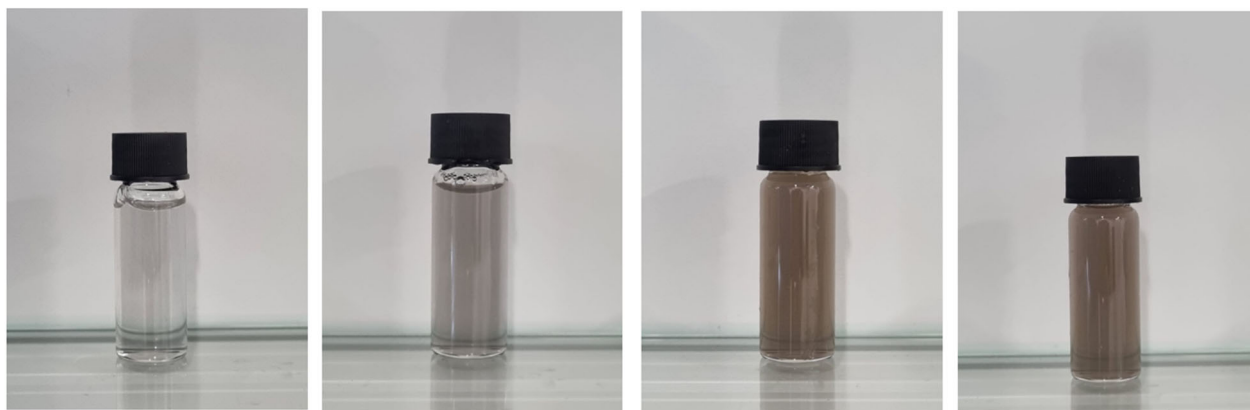

**Figure S4.** Pictures of  $\text{Bi}_2\text{S}_3$  suspensions prepared with SC, 4 mg/mL, in water, using different concentrations of bulk  $\text{Bi}_2\text{S}_3$  (0.33, 0.67, 1.33 and 2.67 mg/mL from left to right). All the exfoliations were performed with a SM for 3 h and using 0.33 mg/mL of  $\text{Bi}_2\text{S}_3$ .

**Table S4.** Zeta potential ( $\zeta$ ), average size (from DLS), band gap (from UV-Vis-NIR), concentration and yield with different exfoliation time of LPE  $\text{Bi}_2\text{S}_3/\text{SC}$ . All the exfoliations were performed with a shear mixer (SM). The concentration of SC in all the experiments is fixed to 4.0 mg/mL, while the concentration of  $\text{Bi}_2\text{S}_3$  was fixed to 1.33 mg/mL.

| Time (h) | $\zeta$ (eV) | Size (nm) | $E_g$ (eV) | Exfoliated $\text{Bi}_2\text{S}_3$ (mg/mL) | Yield % |
|----------|--------------|-----------|------------|--------------------------------------------|---------|
| 3        | -40          | 165       | 1.9        | 0.17                                       | 12.5    |
| 6        | -42          | 160       | 1.8        | 0.18                                       | 13.3    |
| 9        | -40          | 175       | 1.9        | 0.19                                       | 14.0    |

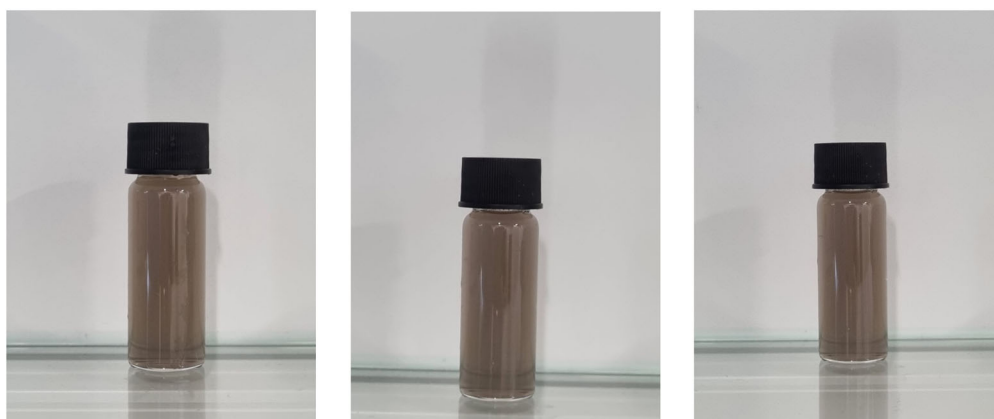

**Figure S5.** Pictures of  $\text{Bi}_2\text{S}_3$  suspensions prepared with SC, 4 mg/mL, in water, using 1.33 mg/mL of bulk  $\text{Bi}_2\text{S}_3$ . All exfoliations took place with a SM and the dispersions were centrifuged for 20 min at 500 RPM. Exfoliation times from left to right were 3, 6 and 9 hours.

**Table S5.** Zeta potential ( $\zeta$ ), average size (from DLS), band gap (from UV-Vis-NIR), concentration and yield with different aqueous solvents of LPE Bi<sub>2</sub>S<sub>3</sub>/SC. All the exfoliations were performed with a shear mixer (SM) for 3 h. The concentration of Bi<sub>2</sub>S<sub>3</sub> in all the experiments is fixed to 0.33 mg/mL and the concentration of SC is 4.0 mg/mL.

| Aqueous solvent            | $\zeta$ (eV) | Size (nm) | E <sub>g</sub> (eV) | Exfoliated Bi <sub>2</sub> S <sub>3</sub> (mg/mL) | Yield % |
|----------------------------|--------------|-----------|---------------------|---------------------------------------------------|---------|
| distilled H <sub>2</sub> O | -40          | 165       | 1.9                 | 0.17                                              | 12.5    |
| isopropanol 25%            | -21          | 300       | 1.8                 | 0.03                                              | 2.5     |
| isopropanol 50%            | -10          | 300       | 1.8                 | 0.02                                              | 1.7     |
| acetone 25 %               | -35          | 140       | 1.8                 | 0.06                                              | 4.7     |
| acetone 50 %               | -30          | 130       | 1.8                 | 0.05                                              | 3.8     |
| acetone 75 %               | -25          | 143       | 2.1                 | 0.01                                              | 1.1     |

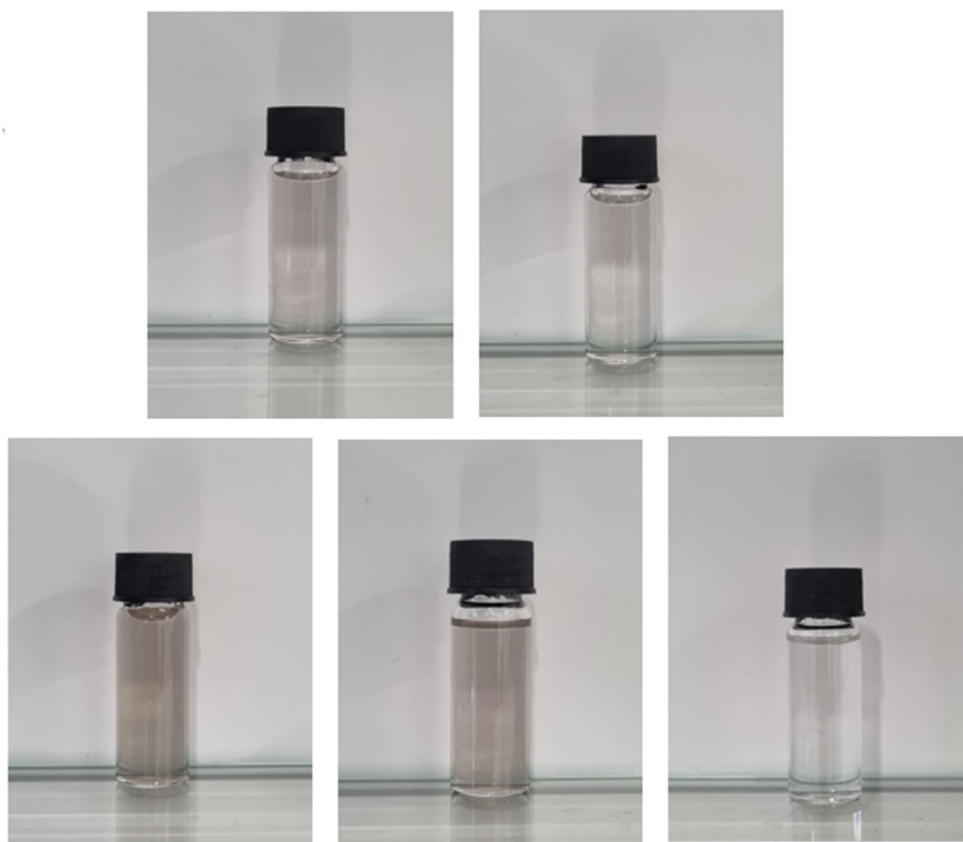

**Figure S6.** Pictures of Bi<sub>2</sub>S<sub>3</sub> suspensions prepared with SC, 4 mg/mL, and 1.33 mg/mL of bulk Bi<sub>2</sub>S<sub>3</sub>. On the top, dispersions in isopropanol aqueous mixtures, the concentration of isopropanol is 25 % and 50 % (v/v), from the left to the right. On the bottom, dispersions in acetone aqueous mixtures, the concentration of acetone is 25 %, 50 % and 75 % (v/v), from the left to the right. All exfoliations were performed with a SM for 3 h.

**Table S6.** Zeta potential ( $\zeta$ ), average size (from DLS), band gap (from UV-Vis-NIR), concentration and yield with different exfoliation methods of LPE Bi<sub>2</sub>S<sub>3</sub>/SC. All the exfoliations were performed for 3 h. The concentration of Bi<sub>2</sub>S<sub>3</sub> in all the experiments is fixed to 0.33 mg/ and the concentration of SC is 4.0 mg/mL.

| Method        | $\zeta$ (eV) | Size (nm) | E <sub>g</sub> (eV) | Exfoliated Bi <sub>2</sub> S <sub>3</sub> (mg/mL) | Yield % |
|---------------|--------------|-----------|---------------------|---------------------------------------------------|---------|
| Shear mixer   | -40          | 165       | 1.9                 | 0.17                                              | 12.5    |
| Tip sonicator | -44          | 155       | 1.9                 | 0.05                                              | 3.9     |

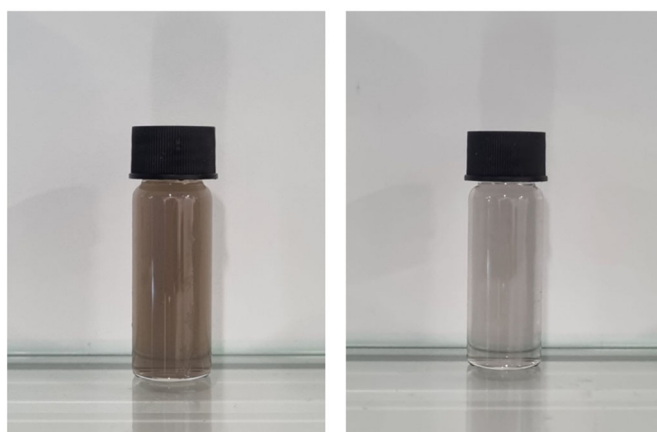

**Figure S7.** Pictures of Bi<sub>2</sub>S<sub>3</sub> suspensions prepared with SC, 4 mg/mL, in water, with 1.33 mg/mL of bulk Bi<sub>2</sub>S<sub>3</sub>. The dispersion displayed on the left is prepared with a SM, the one on the right with a TS. Both exfoliations took place for 3 h and the dispersions were centrifuged for 20 min at 500 RPM.

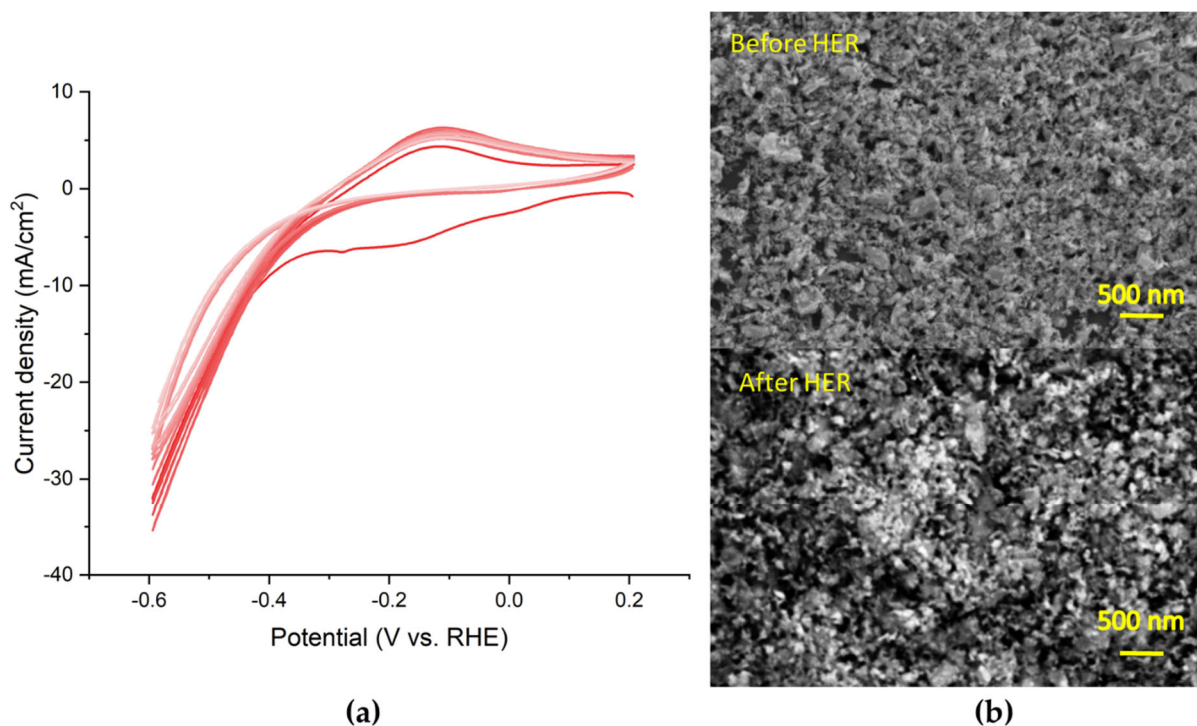

**Figure S8.** (a) CV curves of LPE Bi<sub>2</sub>S<sub>3</sub>/SC (1.61 mg/cm<sup>2</sup>) for HER electrocatalysis at a scan rate of 50 mV/s. (b) SEM image of LPE Bi<sub>2</sub>S<sub>3</sub>/SC before and after the CV test.

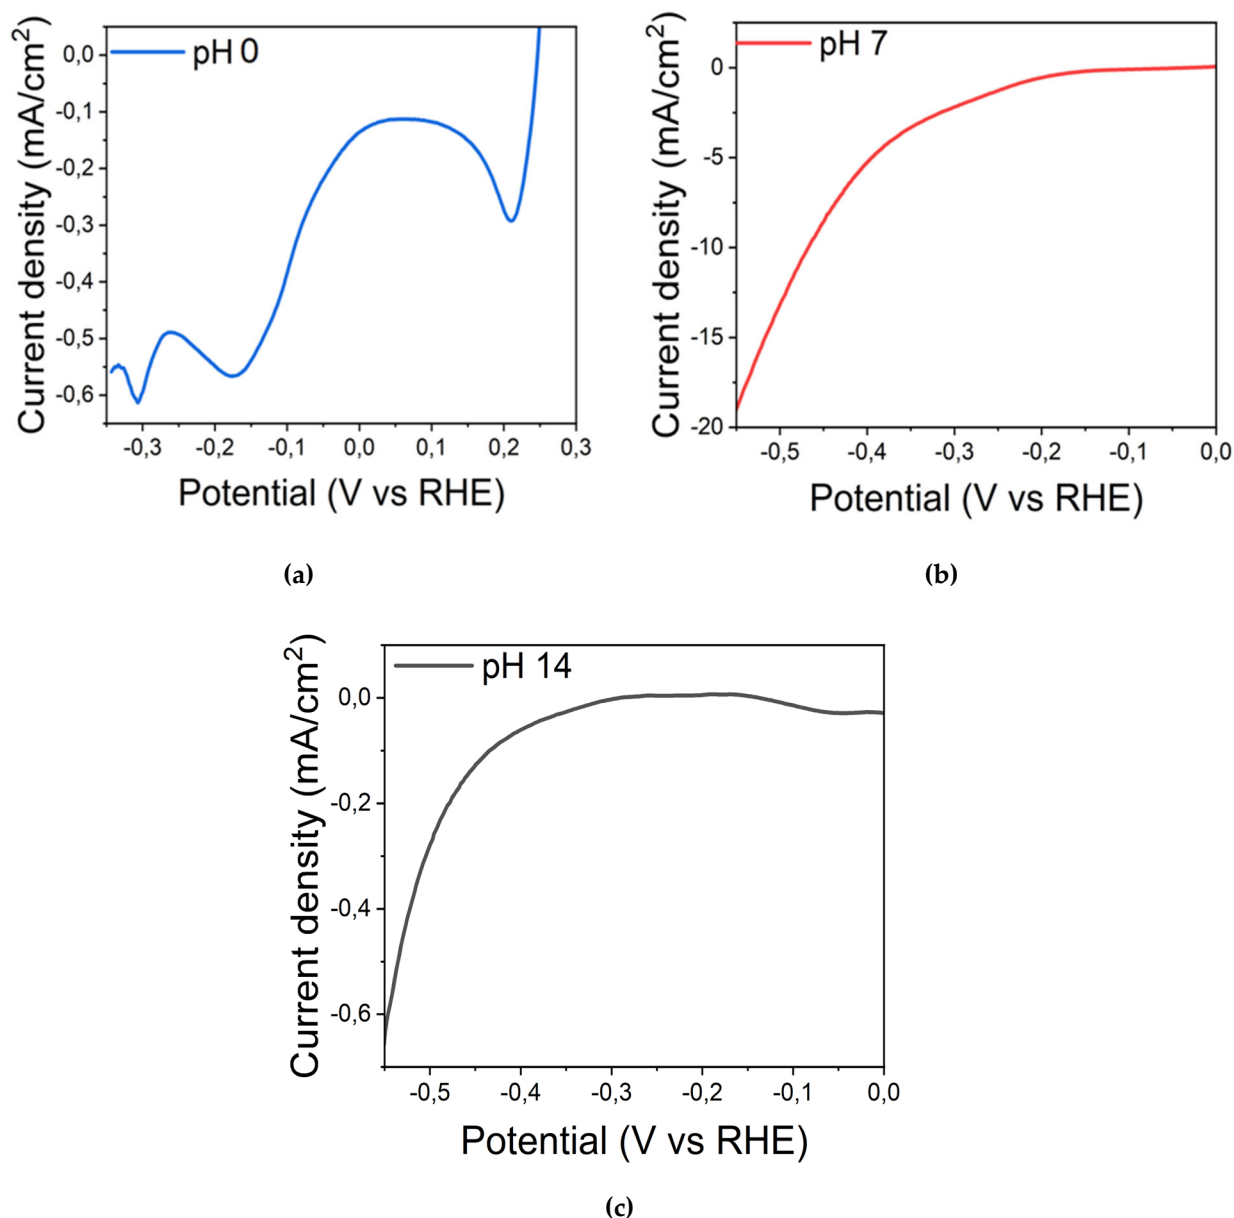

**Figure S9.** LSV (scan rate 10 mV/s) curves of LPE Bi<sub>2</sub>S<sub>3</sub>/SC (1.61 mg/cm<sup>2</sup>) for HER electrocatalysis in (a) pH 0 (H<sub>2</sub>SO<sub>4</sub> 0.5 M); (b) pH 7 (Na<sub>2</sub>SO<sub>4</sub> 0.5 M); (c) pH 14 (KOH 1.0 M).

**Table S7.** Overpotential at 1 mA/cm<sup>2</sup> and Tafel slope referred to LPE Bi<sub>2</sub>S<sub>3</sub>/SC HER activity in neutral conditions. The data collected refers to LPE Bi<sub>2</sub>S<sub>3</sub> thin films produced using different ink loadings on a GC electrode.

| Loading LPE Bi <sub>2</sub> S <sub>3</sub> /SC (mg/cm <sup>2</sup> ) | Overpotential (mV) | Tafel slope (mV/dec) |
|----------------------------------------------------------------------|--------------------|----------------------|
| 0.72                                                                 | -                  | -                    |
| 1.43                                                                 | 285                | 220                  |
| 1.61                                                                 | 235                | 125                  |
| 1.79                                                                 | 305                | 275                  |

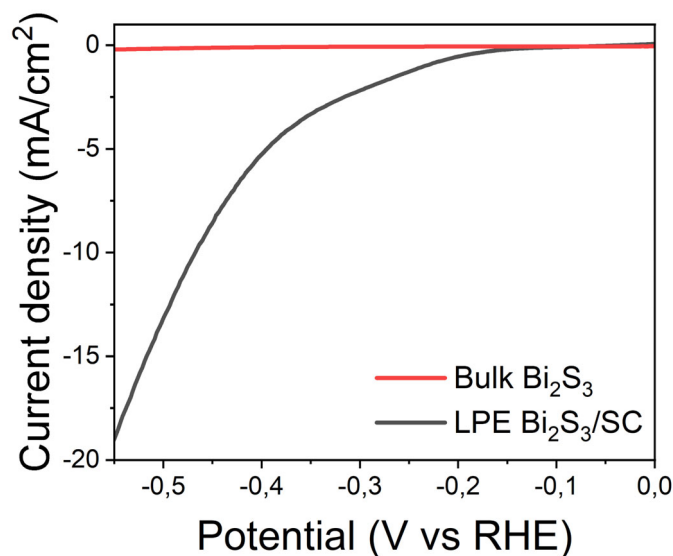

**Figure S10.** LSV curves (scan rate 10 mV/s) of LPE Bi<sub>2</sub>S<sub>3</sub>/SC and bulk Bi<sub>2</sub>S<sub>3</sub> (1.61 mg/cm<sup>2</sup>) as HER electrocatalysts in neutral condition (Na<sub>2</sub>SO<sub>4</sub> 0.5 M).

**Table S8.** Summary of the conditions used for all the exfoliations discussed in this work. Concentrations of starting bulk material, concentrations and types of surfactant (SDS, SC), LPE methods (SM, TS), exfoliation times and aqueous mixtures used as solvents are here listed.

| Bulk Bi <sub>2</sub> S <sub>3</sub><br>(mg/mL) | Surfactant type/concentration<br>(mg/mL) | Exfoliation<br>method | Exfoliation<br>time (h) | Solvent                    |
|------------------------------------------------|------------------------------------------|-----------------------|-------------------------|----------------------------|
| 0.33                                           | SDS/1                                    | SM                    | 3                       | distilled H <sub>2</sub> O |
| 0.33                                           | SDS/2                                    | SM                    | 3                       | distilled H <sub>2</sub> O |
| 0.33                                           | SDS/4                                    | SM                    | 3                       | distilled H <sub>2</sub> O |
| 0.33                                           | SDS/8                                    | SM                    | 3                       | distilled H <sub>2</sub> O |
| 0.33                                           | SC/1                                     | SM                    | 3                       | distilled H <sub>2</sub> O |
| 0.33                                           | SC/2                                     | SM                    | 3                       | distilled H <sub>2</sub> O |
| 0.33                                           | SC/4                                     | SM                    | 3                       | distilled H <sub>2</sub> O |
| 0.33                                           | SC/8                                     | SM                    | 3                       | distilled H <sub>2</sub> O |
| 0.67                                           | SC/4                                     | SM                    | 3                       | distilled H <sub>2</sub> O |
| 1.33                                           | SC/4                                     | SM                    | 3                       | distilled H <sub>2</sub> O |
| 2.67                                           | SC/4                                     | SM                    | 3                       | distilled H <sub>2</sub> O |
| 1.33                                           | SC/4                                     | SM                    | 3                       | isopropanol 25% (v/v)      |
| 1.33                                           | SC/4                                     | SM                    | 3                       | isopropanol 50% (v/v)      |
| 1.33                                           | SC/4                                     | SM                    | 3                       | acetone 25% (v/v)          |
| 1.33                                           | SC/4                                     | SM                    | 3                       | acetone 50% (v/v)          |
| 1.33                                           | SC/4                                     | SM                    | 3                       | acetone 75% (v/v)          |
| 1.33                                           | SC/4                                     | TS                    | 3                       | distilled H <sub>2</sub> O |
| 1.33                                           | SC/4                                     | SM                    | 6                       | distilled H <sub>2</sub> O |
| 1.33                                           | SC/4                                     | SM                    | 9                       | distilled H <sub>2</sub> O |
